# Supplementary material
Source: PubMed Central journal article supplement (PMC7102934)

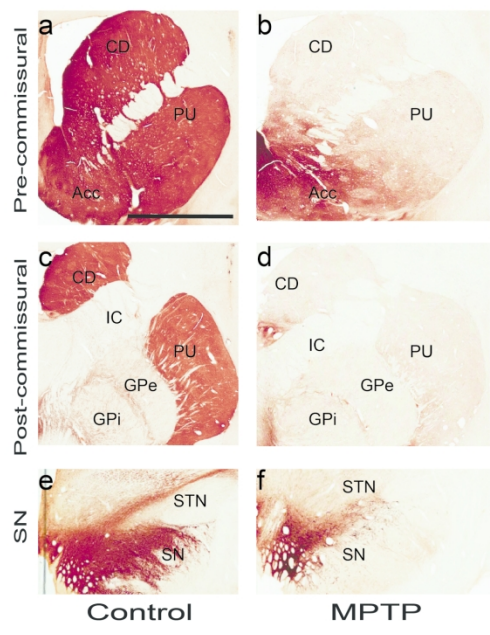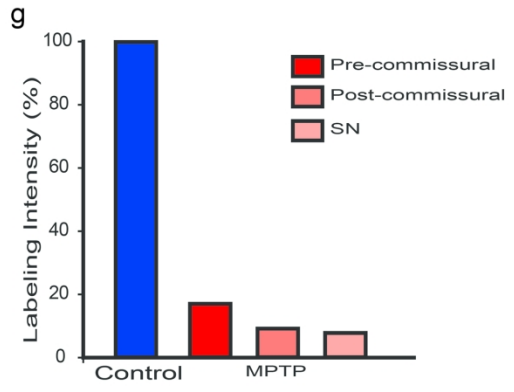

Suppl. Figure 1

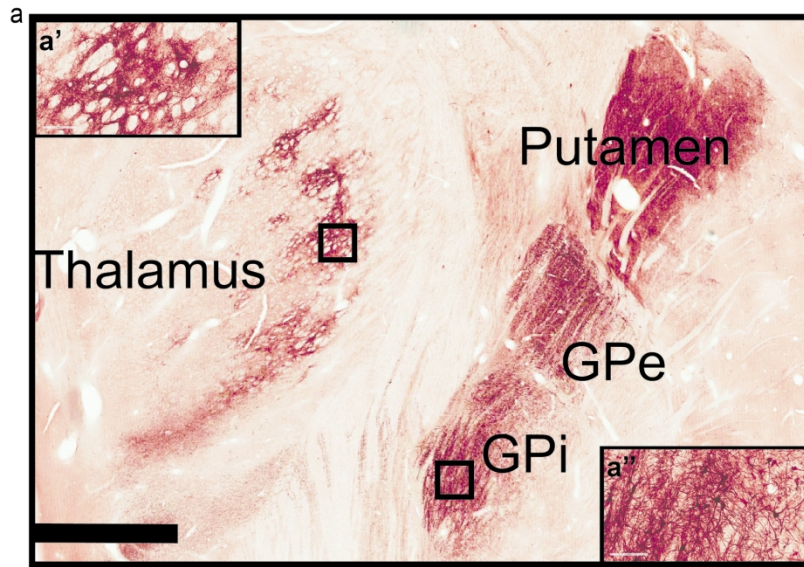

Suppl. Figure 2

Supplement: NIHMS1544981-supplement-1.pdf [file NIHMS1544981-supplement-1.pdf]
